# Localisation of human Y-family DNA polymerase $\kappa$ : relationship to PCNA foci

Tomoo Ogi, Patricia Kannouche\* and Alan R. Lehmann<sup>‡</sup>

Genome Damage and Stability Centre, University of Sussex, Falmer, Brighton, BN1 9RR, UK

\*Present address: Institut Gustave Roussy PR2, UPR2169 CNRS, 39 rue Camille Desmoulins, 94805 Villejuif CEDEX, France

<sup>‡</sup>Author for correspondence (e-mail: a.r.lehmann@sussex.ac.uk)

Accepted 21 October 2004

Journal of Cell Science 118, 129-136 Published by The Company of Biologists 2005

doi:10.1242/jcs.01603

## Summary

DNA polymerases of the Y-family are involved in translesion DNA synthesis past different types of DNA damage. Previous work has shown that DNA polymerases  $\eta$  and  $\iota$  are localised in replication factories during S phase, where they colocalise one-to-one with PCNA. Cells with factories containing these polymerases accumulate after treatment with DNA damaging agents because replication forks are stalled at sites of damage. We now show that DNA polymerase  $\kappa$  (pol $\kappa$ ) has a different localisation pattern. Although, like the other Y-family polymerases, it is exclusively localised in the nucleus, pol $\kappa$  is found in replication foci in only a small proportion of S-phase cells.

It does not colocalise in those foci with proliferating cell nuclear antigen (PCNA) in the majority of cells. This reduced number of cells with pol $\kappa$  foci, when compared with those containing pol $\eta$  foci, is observed both in untreated cells and in cells treated with hydroxyurea, UV irradiation or benzo[a]pyrene. The C-terminal 97 amino acids of pol $\kappa$  are sufficient for this limited localisation into nuclear foci, and include a C<sub>2</sub>HC zinc finger, bipartite nuclear localisation signal and putative PCNA binding site.

Key words: DNA polymerase, PCNA, Replication foci, Translesion synthesis, UV irradiation

## Introduction

All cells have evolved a variety of pathways for repairing different types of DNA damage. Despite the efficiency of these pathways, unrepaired lesions remain in the DNA during DNA replication, and most types of DNA damage block the progress of the replication machinery. The replicative DNA polymerases are very efficient and processive, and replicate DNA with high fidelity. However, they are unable to accommodate damaged DNA bases in their active sites and such lesions block their progress. A major way in which mammalian cells overcome this barrier is to use specialised translesion synthesis (TLS) polymerases. These polymerases have low efficiencies and fidelities, but are able to replicate DNA past different types of damage (reviewed by Lehmann, 2002; Prakash and Prakash, 2002). Four of these TLS polymerases belong to the recently discovered Y-family (Ohmori et al., 2001). DNA polymerase  $\eta$  (pol $\eta$ ) is able to replicate DNA containing the major UV photoproduct, the cyclobutane pyrimidine dimer (CPD) with similar efficiency to undamaged DNA, and in the case of the T-T CPD, the 'correct' nucleotides (A-A) are usually inserted opposite the damage (Johnson et al., 2000b; Masutani et al., 2000). Deficiency in pol $\eta$  results in the variant form of xeroderma pigmentosum (Broughton et al., 2002; Johnson et al., 1999; Masutani et al., 1999). Pol $\iota$  is a paralog of pol $\eta$  (Tissier et al., 2000), but despite extensive studies on its activities in vitro, its function in vivo remains unknown.

Pol $\kappa$  is able to carry out TLS past benzo[a]pyrene (BaP) adducts in DNA (Rechkooblit et al., 2002; Suzuki et al., 2002; Zhang et al., 2002) and also past apurinic or apyrimidinic (AP) sites, acetylaminofluorene-DNA adducts (Ohashi et al., 2000b)

and thymine glycols (Fischhaber et al., 2002). *Polk*<sup>-/-</sup> mouse embryonic stem cells are hypersensitive to both killing and mutagenesis by BaP (Ogi et al., 2002), suggesting that this polymerase might carry out TLS past polycyclic hydrocarbon adducts in vivo. However *Polk*<sup>-/-</sup> embryonic stem cells and fibroblasts are also sensitive to UV irradiation, implicating pol $\kappa$  in the response to UV photoproducts (Ogi et al., 2002; Schenten et al., 2002), even though it is unable to bypass either of the major UV photoproducts (Ohashi et al., 2000b; Zhang et al., 2002). Pol $\zeta$  is a heterodimer comprised of a catalytic subunit Rev3, which is a member of the B-family of polymerases, together with the Rev7 regulatory subunit. Current theories suggest that pol $\zeta$  is required for extension from nucleotides inserted by other polymerases opposite damaged bases (Guo et al., 2001; Johnson et al., 2000a). The fourth member of the Y-family is Rev1, which does not have DNA polymerase activity, but does have dCMP transferase activity (Nelson et al., 1996). Studies in yeast have shown that Rev1, 3 and 7 are required for UV mutagenesis, but the mutagenic function and dCMP transferase activity of Rev1 can be separated (Nelson et al., 2000).

The Y-family DNA polymerases have a conserved sequence of about 400 amino acids, which contain the catalytic site and C-terminal extensions that are not conserved between members. In previous work, we showed that pol $\eta$  is localised in the nucleus, and is found constitutively in nuclear foci, which contain PCNA and represent replication factories in S-phase cells (Kannouche et al., 2001). Following treatment with UV irradiation, stalling of replication forks at damaged sites results in an accumulation of cells in S phase, and the number

of cells with pol $\eta$ -containing foci increases substantially as a consequence. Treatment of cultures with hydroxyurea similarly results in an accumulation of cells with pol $\eta$  in replication foci (P.K. and A.R.L., unpublished). In all these cases, the pol $\eta$  foci colocalise with PCNA. The C-terminal 119 amino acids are sufficient for correct localisation of pol $\eta$  into nuclei and nuclear foci (Kannouche et al., 2001). This C-terminal fragment contains a C<sub>2</sub>H<sub>2</sub> zinc finger, a nuclear localisation signal and a PCNA binding site, all of which are required for correct localisation (P.K. and A.R.L., unpublished). In subsequent work, we found that pol $\iota$  and Rev1 had identical localisation patterns to pol $\eta$ , and in the case of pol $\iota$  (but not Rev1), its localisation was dependent on the presence of pol $\eta$  (Kannouche et al., 2003; Tissier et al., 2004).

Polk is an 870 amino acid protein, related to DNA polymerase IV (DinB) of *Escherichia coli*. Amino acids 100–376 contain polymerase domains conserved throughout the Y-family, whereas amino acids 376–500 are conserved only within the DinB sub-family. Truncated protein containing the first 560 residues has polymerase activity, although less than the full-length protein (Ohashi et al., 2000a). The C-terminal 270 amino acids of the protein contain two C<sub>2</sub>HC zinc fingers, a bipartite NLS and a putative PCNA binding site at the extreme C terminus (Gerlach et al., 1999; Haracska et al., 2002). This region thus encompasses several motifs that resemble those in the C-terminal part of pol $\eta$ . We therefore anticipated that the localisation of polk would be similar to that of the other Y-family polymerases. Here we describe an investigation of the localisation of polk. Surprisingly we found that, although it was always located in the nucleus, the proportion of nuclei containing polk in nuclear foci was much lower than for pol $\eta$ . We have identified the elements required for its localisation.

## Materials and Methods

### Plasmid construction

GFP-tagged human polk, pEGFPC2-polk, was provided by J. S. Hoffmann (Bergoglio et al., 2002). We generated a similar construct with a different GFP vector. We modified *POLK* cDNA by deleting the first ATG codon by PCR using plasmid pSHE2, which contains intact human *POLK* cDNA, as a template and 5'-gggctcgagctc-GATAGCACAAGGAGAAGTGTGACAG-3' and 5'-gggagatcc-TTACTTAAAAAATATATCAAGGGTATGTTTGGG-3' as primers. PCR products were digested with *XhoI* and *BamHI*, and then cloned into *XhoI-BamHI* sites of pEGFP-C3 (Clontech) to generate pEGFPC3-HsPOLK, which we abbreviate to pEGFPpolk.

A series of deletion and point mutations of GFP-tagged human POLK were generated from pEGFPpolk: Sa11 (dK870), deletion of final lysine residue K870; Sb31 (FF868/9AA), substitution of double phenylalanine residues F868F869 to alanines; Sc11 (dPCNA), deletion of C-terminal 9 amino acids K862 to K870; and Sd11 (dNLSdPCNA), deletion of C-terminal 29 amino acids K842 to K870 were obtained by fragment replacement of corresponding regions. PCR was performed using pSHE2 as a template, 5'-GACAGG-AAACACCAACAAAGGAGCAT-3' as a 5' common primer, and 3' specific primers: for Sa11, 5'-gggagatccTTAAAAAATATATCAAGGGTATGTTTGGG-3'; Sb31, 5'-gggagatccTTACTTAGCAGCTATATCAAGGGTATGTTTGGG-3'; Sc11, 5'-gggagatccTTAGGGAT-TGTTTGGTTTTATTCTTTG-3'; Sd11, 5'-gggagatccTTATGTTCTTGTACAGCCTTCTGTACTCC-3'. PCR fragments were digested with *XbaI* and *BamHI*, and replaced the corresponding *XbaI-BamHI* fragment of pEGFPpolk.

N-terminal truncation mutants were generated by PCR amplification of the desired regions and cloning into pEGFP-C3. PCR was performed using pSHE2 as a template, 5'-gggagatccTTACTTAAAAAATATATCAAGGGTATGTTTGG-3' as a 5' common primer, and 3' specific primers; for TA (c510-870; C-terminal 510-870 amino acids), 5'-gggctcgagGGTGTTCGGATATCTAGTTTTTC-3'; TB (c570-870), 5'-gggctcgagAAAAACGATCAGAAAAGGA-AATGGAG-3'; TC (c547-870), 5'-gggctcgagTTAGAGAAAAC-TGACAAAGATAAGTTTG-3'; TD (c603-870), 5'-gggctcgagAA-GAAGAAGATGAATGAGAATTTGG-3'; TE (c824-870), 5'-gggctcgagAGCTCCAGAAGTACTGGTAGC-3'; TF (c842-870), 5'-gggctcgagAAAAGGCCAGGATTGATGACAAAG-3'; TH (c710-870), 5'-gggctcgagTTAAATAAAAGTTTTATCCAAGAATTAAG-3'; TI (c774-870), 5'-gggctcgagGGCCAAGCTCTAGTTTGTCTGTTTG-3'; TJ (c774-870:C779C782AA), 5'-gggctcgagGGCCAAGCT-CTAGTTGCTCCTGTTGCTAACGTAG-3'; TK (c710-870), 5'-gggctcgagTCATCTAAAGCAGAAAAGCATAGATGC-3'. PCR products were digested with *XhoI* and *BamHI*, and then cloned into the *XhoI-BamHI* sites of pEGFP-C3.

### Cells and transfection of plasmid DNA

SV40-transformed wild-type MRC5 and pol $\eta$ -deficient XP3ORO human fibroblasts were used in all experiments. Cells were grown in DMEM supplemented with 10% fetal calf serum, and antibiotics. Plasmid transfections were carried out by lipofection with lipofectamine (Gibco) or FuGENE 6 (Roche).

### UV irradiation, gamma irradiation and drug treatments

254 nm UVC irradiation was performed with a germicidal lamp at a fluence rate of 0.4 J/m<sup>2</sup>/second. Cells cultivated on coverslips were washed once with PBS and UV irradiated followed by further incubation. For  $\gamma$  irradiation, cells were trypsinised, suspended in PBS, and irradiated with a <sup>60</sup>Co irradiator at a dose rate of 1 Gy/minute. For hydroxyurea (HU) treatment, cells were incubated in complete medium with 10 mM HU for indicated times. For BaP treatment, the drug was activated with S-9 fraction of rat liver homogenates (S9, Sigma) just before treatment. Cells were treated for the indicated times in complete medium containing 20  $\mu$ M BaP, 0.1% S9 and 0.1% DMSO.

### Sub-nuclear fractionation and western blotting

2 $\times$ 10<sup>6</sup> MRC5 cells were transfected with pEGFPpolk or pEGFPpol $\eta$  plasmids and cultured for 20 hours. They were then UV irradiated and incubated for 6 hours, prior to washing twice with PBS and scraping off into PBS. Cell pellets were collected by centrifugation (200 g) and resuspended in 500  $\mu$ l hypotonic buffer [HB; 10 mM HEPES pH 7.9, 1.5 mM MgCl<sub>2</sub>, 10 mM KCl, 0.1 M DTT, 0.5% NP-40, 1 mM PMSF,  $\times$ 1 Complete protease inhibitor mix (Roche)]. Cell suspensions were kept on ice for 30 minutes and then centrifuged. The supernatant was collected for cytoplasm and unbound fraction (UB). Pellets were washed with HB twice, and resuspended in 100  $\mu$ l extraction buffer (EB; 20 mM HEPES pH 7.9, 1.5 mM MgCl<sub>2</sub>, 0.1 mM DTT, 0.2 mM EDTA, 25% Glycerol v/v, 500 mM NaCl, 1 mM PMSF,  $\times$ 1 Complete protease inhibitor mix). Nuclear extraction was performed with gentle agitation for 30 minutes at 4°C, and then centrifuged. The supernatant is the nuclear binding fraction (NcB). Pellets were then washed twice with HB, resuspended in HB containing 5 U/ml Benzonase (Novagen) for 2 hours at 16°C, and then centrifuged. The supernatant was used as the chromatin-binding fraction (ChrB). Fractionated proteins were desalted and concentrated. Protein extracts (10  $\mu$ g) were separated in 8% SDS-PAGE, transferred to PVDF membranes, and probed with rabbit anti-GFP primary antibody (Roche) and horseradish peroxidase-conjugated goat anti-rabbit secondary antibody (DAKO). GFP-tagged proteins were detected by the ECL detection system.

### Microscopic observation

To visualise the eGFP proteins, cells were grown on coverslips, transfected and then treated with DNA damaging agents. At the end of the experiment, cells were washed once with PBS, fixed in 3.7% paraformaldehyde for 20 minutes, rinsed twice with PBS and mounted with Glycergel (Dako). To detect the colocalisation of eGFPpol $\kappa$  and PCNA, cells were fixed in cold methanol for 20 minutes at  $-20^{\circ}\text{C}$  and then incubated for 30 seconds with cold acetone to extract the soluble PCNA fraction. Cells were washed with PBS twice, and then incubated with anti-PCNA antibody (PC-10, SantaCruz) diluted 1:100 in 3% BSA containing PBS for 1 hour. Then, cells were washed twice with PBS and incubated with rhodamine-conjugated anti-mouse antibody (Jackson Immunoresearch Laboratories) diluted 1:250 in PBS containing 3% BSA. After washing three times with PBS, cells were mounted with Glycergel. Pol $\kappa$  was visualised by autofluorescence of the eGFP.

Photographs of the cells were captured with a Zeiss Axiophot2 microscope equipped with CCD camera, and captured images were analysed with MetaMorph and Photoshop software. A minimum of 300 nuclei were captured and analysed for colocalisation.

## Results

### Limited localisation of pol $\kappa$ in nuclear foci

In our previous work, we showed that pol $\eta$ , pol $\iota$  and Rev1 were constitutively localised in replication factories during S phase. S-phase cells with replication foci containing pol $\eta$ , pol $\iota$  and Rev1 accumulated following UV irradiation, because replication forks stalled at damaged sites (Kannouche et al., 2001; Kannouche et al., 2003; Tissier et al., 2004). We therefore anticipated a similar localisation pattern for pol $\kappa$ . In all our experiments, we compared the localisation of eGFPpol $\kappa$  with that of eGFPpol $\eta$  used in previous experiments. Consistent with previous reports, eGFPpol $\eta$  localised in nuclei and up to 80% of the cell population formed eGFPpol $\eta$  foci 16 hours after UV irradiation with 10 J/m<sup>2</sup> (Kannouche et al., 2001; Kannouche et al., 2003). We obtained a similar result 16 hours after treatment with HU (Fig. 1A). We found that the number of cells with eGFPpol $\kappa$  foci increased following treatment with UV or HU, but the proportion of the cell population that formed eGFPpol $\kappa$  foci (~25%) was much lower than for eGFPpol $\eta$  foci, irrespective of whether the cells were untreated or treated with HU or UV (Fig. 1A). Without any DNA damaging treatments, we found that eGFPpol $\eta$  accumulated in foci in approximately 20% of the cell population, corresponding to cells in S phase, whereas only around 5% of the cell population formed eGFPpol $\kappa$  foci (Fig. 1A, compare open black bars with open red bars). After UV or HU treatment, pol $\kappa$  foci were observed in 15–20 and 20–25% of the population respectively, whereas pol $\eta$  foci were found in 60–80%. Typical images of UV irradiated MRC5 cells expressing eGFPpol $\kappa$  and eGFPpol $\eta$  are shown (Fig. 1B,C).

The cellular localisation of pol $\kappa$  protein and its behaviour after DNA damaging treatments has been reported (Bergoglio et al., 2002). Using a similar N-terminal eGFP-tagged pol $\kappa$  construct, this group reported a substantially greater DNA damage-dependent localisation of pol $\kappa$  into nuclear foci than we found. In order to determine the reason for this apparent discrepancy, even though we had designed and used a very similar plasmid and the same SV40-transformed MRC5 cells that were used in their report, we obtained the exact plasmid and cell line used by these authors. We checked whether the

different plasmid and cells affected pol $\kappa$  nuclear foci formation (Fig. 1A). However, neither the plasmid nor the cell line affected the results. The blue bars in Fig. 1A represent results obtained with plasmid from Bergoglio and colleagues (GFPK-Tou), and the solid bars are data using the cell line obtained from them (Bergoglio et al., 2002). It is clear that neither the plasmid nor the cells could account for the discrepancies between the two sets of findings.

There is evidence from both *in vitro* and *in vivo* studies that pol $\kappa$  might participate in translesion synthesis across BaP-adducted bases (Ogi et al., 2002; Zhang et al., 2002), so we checked whether pol $\kappa$  accumulated in nuclear foci following treatment with 20  $\mu\text{M}$  BaP treatment. As with UV irradiation and HU treatment, pol $\eta$  accumulated in nuclear foci in a high proportion of cells. The number of cells containing pol $\kappa$  foci also increased, but again we found foci containing pol $\kappa$  in a much lower proportion (20%) of the population (Fig. 1A, right). Similar results were obtained with other doses of BaP and incubation times (results not shown). With  $\gamma$  irradiation, neither pol $\eta$  nor pol $\kappa$  foci accumulated.

We next examined the correlation between foci formation and accumulation of protein in the chromatin fraction (Fig. 1D). The accumulation of eGFPpol $\eta$  protein into nuclear foci after UV irradiation is accompanied by an increased amount of eGFPpol $\eta$  protein in the chromatin fraction after UV irradiation (lane 12, compare lane 9). In contrast, we could not detect any significant increase of eGFPpol $\kappa$  protein in the chromatin fraction after UV irradiation (compare lanes 6 and 3), consistent with the low number of cells in which pol $\kappa$  was present in nuclear foci. We obtained similar results with HU-treated cells (data not shown).

### Localisation of pol $\kappa$ and PCNA

We previously showed that pol $\eta$  and pol $\iota$  colocalised with PCNA in nuclear foci (Kannouche et al., 2001; Kannouche et al., 2003). This suggests that pol $\eta$  is tightly associated with the replication machinery. In contrast, the poor accumulation of pol $\kappa$  into nuclear foci after UV irradiation and the low fraction of the cell population that formed pol $\kappa$  foci in untreated cells and in cells treated with the replication inhibitor HU, suggest that the association of pol $\kappa$  protein with the replication fork or replication machinery is far weaker than for pol $\eta$ . To assess the colocalisation of pol $\kappa$  and PCNA foci, pEGFPpol $\kappa$ -transfected cells were UV irradiated and stained with anti-PCNA antibody. First, eGFPpol $\kappa$ -expressing cells were analysed and classified for the presence or absence of pol $\kappa$  and PCNA foci following UV irradiation (Fig. 2A). Consistent with previous reports, PCNA foci were observed in 79% of the cell population that expressed eGFPpol $\kappa$ . Of these cells with PCNA foci, however, only 23% (18% of the whole population) also contained eGFPpol $\kappa$  foci. Cells with PCNA foci were then further analysed as to whether these foci colocalised with pol $\kappa$  foci (Fig. 2A inner columns, top left). We observed four different types of localisation pattern: complete colocalisation of PCNA and eGFPpol $\kappa$  (Fig. 2B); partial colocalisation (Fig. 2C); no eGFPpol $\kappa$  foci in PCNA foci forming cells (Fig. 2D); no colocalisation, although both eGFPpol $\kappa$  and PCNA formed foci (Fig. 2E). Both completely and partially colocalised cases were classified as colocalisation positive, and the others were classified as colocalisation negative. Our data show that the

**Fig. 1.** Localisation of polk following DNA damage. (A) Foci formation frequencies of polk after DNA damaging (UV irradiation, BaP and  $\gamma$ -irradiation) or replication inhibitory (HU) treatments. MRC5 cells from our laboratory (GDSC, open bars) or from the laboratory of Bergoglio and colleagues (Tou, shaded bars) were transfected with eGFPpolk constructed in our laboratory (GFPK, black), eGFP-C2-*HsPOLK* constructed in the laboratory of Bergoglio (GFPK-Tou, blue), or eGFPpol $\eta$  (GFPH, red) and incubated for 20 hours. Cells were then treated with the indicated doses of damaging agents and further incubated for the indicated times. The proportion of eGFPpolk (or eGFPpol $\eta$ )-expressing cells in which the protein was localised in nuclear foci was determined. All experiments were carried out in triplicate and each data point is the mean of three independent scorings.

Benzo[a]pyrene (BaP) and  $\gamma$ -ray experiments were carried out only with cells and plasmid from our laboratory. Error bars indicate standard error. (B,C) Typical images of cells expressing eGFPpolk (B), or eGFPpol $\eta$  (C) 6 hours after 10 J/m<sup>2</sup> UV irradiation. (D) Sub-nuclear polk protein localisation after UV irradiation. MRC5 cells were transfected with pEGFPpolk, or pEGFPpol $\eta$  and incubated for 20 hours. Cells were then UV irradiated with 10 J/m<sup>2</sup> and incubated for 6 hours. Cellular proteins were fractionated into detergent extractable (unbound, UB), salt extractable nuclear matrix binding fraction (NcB) and a fraction resistant to salt extraction (chromatin binding, ChrB) and analysed by immunoblotting.

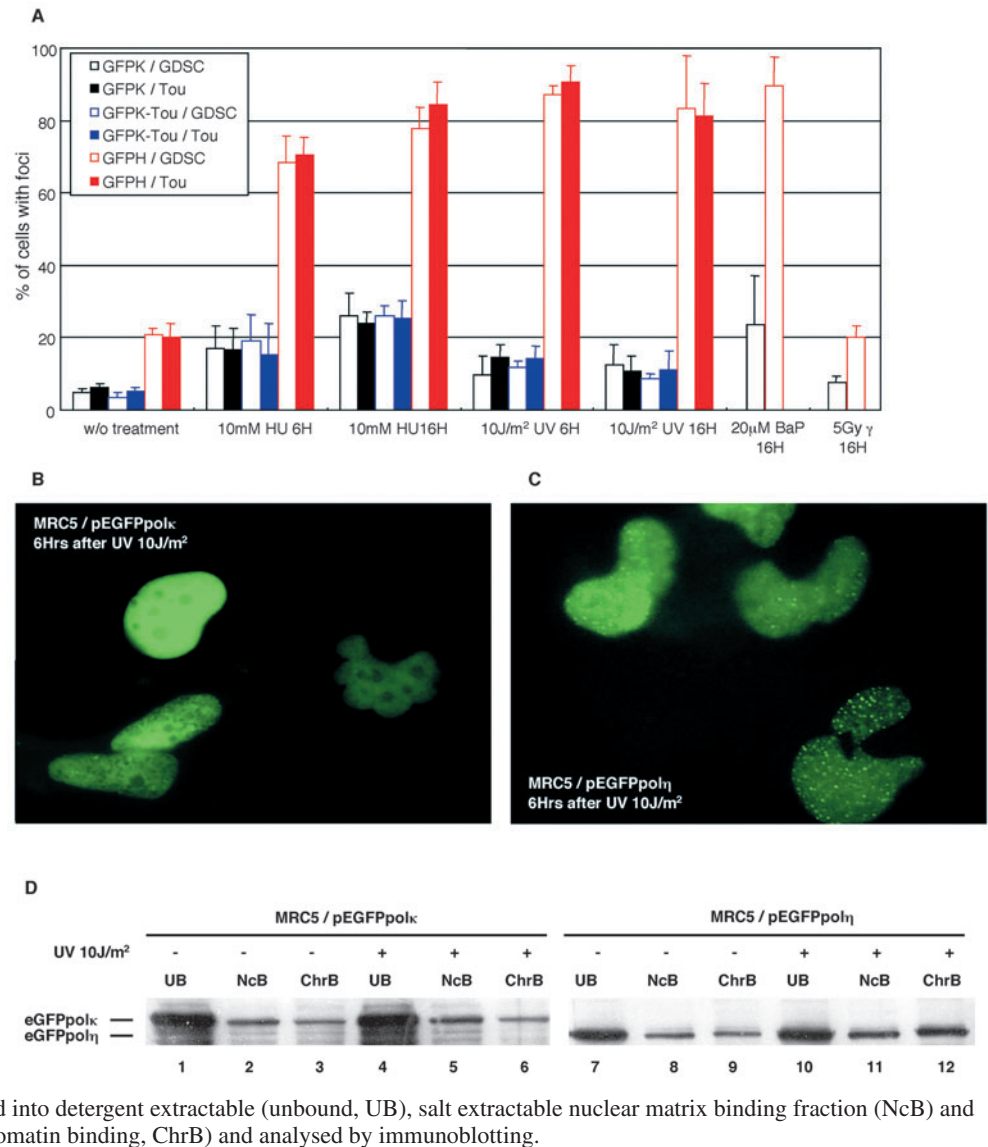

colocalisation of polk with PCNA is quite different from that of pol $\eta$ . Similar results were obtained after HU treatment.

#### The C-terminal region of polk is essential for nuclear localisation and localisation of protein into nuclear foci after UV irradiation and HU treatment

All the mammalian Y-family polymerases consist of N-terminal TLS polymerase domains and C-terminal domains of an extra 200-300 amino acids, the latter being dispensable for DNA synthesis and translesion synthesis in vitro (Masutani et al., 2000; Ohashi et al., 2000a). It has also been reported that truncation of the C-terminal 310 amino acids of polk protein reduced the processivity of the enzyme (Ohashi et al., 2000a). The C-terminal domain of polk contains two C<sub>2</sub>HC zinc fingers, a bipartite NLS and, at the extreme C-terminus, a putative PCNA binding sequence. To identify the sequences that are involved in nuclear localisation and foci formation of polk, a series of eGFP-tagged deletion mutants were generated (C-terminal truncations and amino acid substitution mutants

are summarized in Fig. 3A; N-terminal truncation mutants are shown in Fig. 3B). Fluorescence microscopy showed that all the eGFP fusion proteins were expressed, and we did not detect any protein aggregation in cytoplasmic particles. The predicted NLS is located in polk at position 842-859. The eGFPpolk construct deleting C-terminal amino acids 842-870 (dNLSdPCNA) was excluded from nuclei (Fig. 3A, bottom row; Fig. 3C) and no nuclear foci were detected with this construct in cells treated with UV or HU. Constructs c547-870, c570-870 and c603-870, which completely lack the polymerase domain, displayed 100% nuclear localisation and formed foci in undamaged, UV-irradiated or HU-treated cells with similar frequencies to wild-type constructs (Fig. 3B, top four rows; Fig. 3D). These results show that the polymerase catalytic domain is not required for protein localisation, as also found in our previous work with pol $\eta$  and polt (Kannouche et al., 2001; Kannouche et al., 2003). We next tested if the C<sub>2</sub>HC type Zn finger domains were essential for nuclear localisation and foci formation. Removal of the N-terminal zinc finger (construct c710-870) did not affect localisation. eGFP-tagged

|                    | eGFPpolk foci positive   |                          | eGFPpolk foci negative |
|--------------------|--------------------------|--------------------------|------------------------|
|                    | 18.2 $\pm$ 3.2           |                          | 81.8 $\pm$ 3.2         |
| PCNA foci positive | Co-localization positive | Co-localization negative | 60.9 $\pm$ 4.5         |
| 79.1 $\pm$ 7.4     | 13.9 $\pm$ 2.1           | 4.3 $\pm$ 1.3            |                        |
| PCNA foci negative | 0                        |                          | 20.9 $\pm$ 7.4         |
| 20.9 $\pm$ 7.4     |                          |                          |                        |

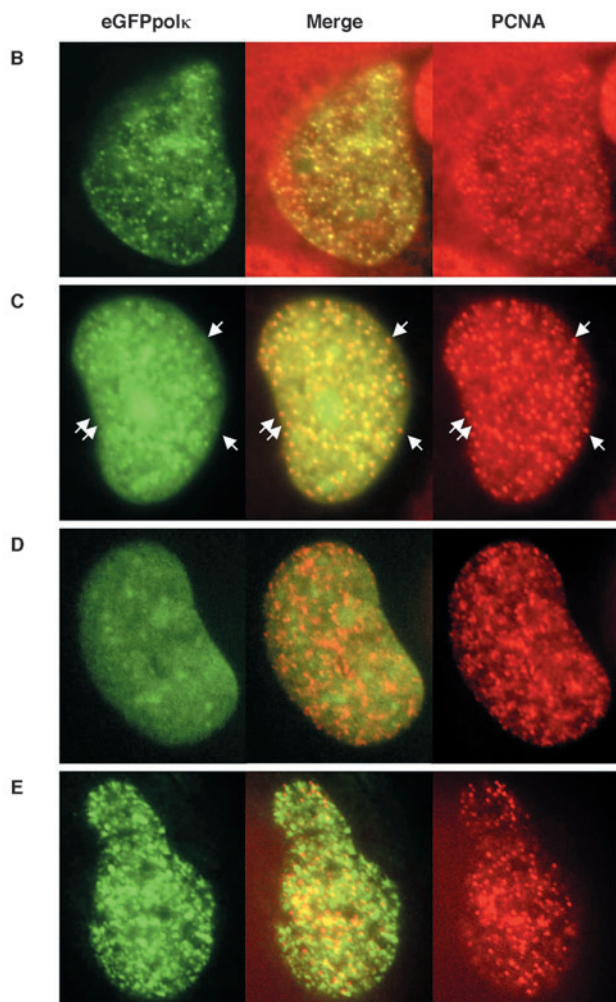

constructs c802-870, c824-870 and c842-870, lacking both C<sub>2</sub>HC domains were still mainly localised in nuclei, although there was some leakage of the protein into the cytoplasm (Fig. 3B, last three rows; Fig. 3E,F). However, no nuclear foci were observed even after UV or HU treatment, suggesting that one of the Zn finger motifs is important for polk localisation into nuclear foci. We made two further deletion constructs, c774-870 and c774-870C779C782AA. The N-terminus of these constructs is just five amino acids upstream of the first cysteine of the C-terminal zinc finger and both constructs were localised in the nucleus. In the former however, foci formation was significantly reduced (Fig. 3G). Most surprisingly however, in the latter construct, in which two of the three cysteines in the zinc finger were converted into alanines, foci formation was actually improved and was similar to that with full-length polk (Fig. 3H). Thus although the domain containing this zinc finger

**Fig. 2.** Localisation of polk and PCNA after UV irradiation. MRC5 cells were transfected with pEGFPpolk and incubated for 20 hours. Cells were UV irradiated with 10 J/m<sup>2</sup> and incubated for 6 hours. Cells were then fixed and stained with anti-PCNA mouse monoclonal antibody and rhodamine-conjugated secondary antibody. Colocalisation of eGFPpolk and PCNA foci was analysed. (A) eGFPpolk-expressing cells were selected and sorted by the foci formation property of polk and PCNA. To check the colocalisation of foci, images of the cells that form both eGFPpolk and PCNA foci were captured and then further analysed. Experiments were carried out in triplicate, and indicated numbers are the averages and the standard deviations of three independent experiments. More than 100 cells were analysed in each experiment. (B-E) Typical staining patterns of the auto-fluorescent signal of eGFPpolk (green) and PCNA (red) in the same cell are shown. (B) Complete colocalisation of eGFPpolk foci and PCNA foci was observed as shown by yellow staining. (C) Partial colocalisation of eGFPpolk foci and PCNA foci. Most of the PCNA foci colocalised with eGFPpolk foci, but significant numbers of eGFPpolk foci were missing (white arrows). (D) eGFPpolk foci were completely absent in cells with PCNA foci. (E) eGFPpolk foci and PCNA foci were not colocalised at all.

is required for foci formation, the zinc finger motif itself is not required. Indeed, it appears to be counterproductive in this context.

We also tested whether the conserved PCNA binding motif was involved in foci formation. Human polk has a postulated PCNA binding domain at position 862-870 that is conserved in vertebrate polk. We made three different mutations in this domain: eGFP-tagged dK870, in which the final lysine residue located at 870 was deleted; FF868/9AA, substitutions of tandem phenylalanine residues to alanines; dPCNA, deletion of amino acids 862-870. All these mutants were localised in the nucleus, but none of them formed foci even after UV irradiation or HU treatment (Fig. 3A top four panels; Fig. 3I).

#### Pol $\eta$ is not necessary for polk foci formation

We previously reported that pol $\eta$  and polt interacted physically and colocalised in nuclear foci (Kannouche et al., 2003). Furthermore, the localisation of polt in foci was largely dependent on pol $\eta$ , as polt foci formation was much reduced in the XP variant cell line XP3ORO, which is defective in pol $\eta$ . In contrast, in similar experiments using polk, we found no difference in the localisation patterns in nuclei and nuclear foci in XP3ORO and MRC5 cells, with or without UV irradiation (Fig. 4). Similar results were obtained after HU treatment (not shown). Thus, the limited localisation of polk into nuclear foci is not dependent on pol $\eta$ .

#### Discussion

We have shown that, like the other Y-family polymerases, polk is localised in the nucleus in human cells. Interestingly, however, the localisation of polk in replication foci and the accumulation of nuclei with foci containing polk following UV or HU treatment are much more limited than with the other polymerases. In the cases of pol $\eta$  and polt, there is a one-to-one correspondence of foci containing PCNA and those containing polymerase (Kannouche et al., 2001; Kannouche et al., 2003). In other words, each replication factory contains pol $\eta$  and polt molecules. As Rev1 colocalises with pol $\eta$ , we

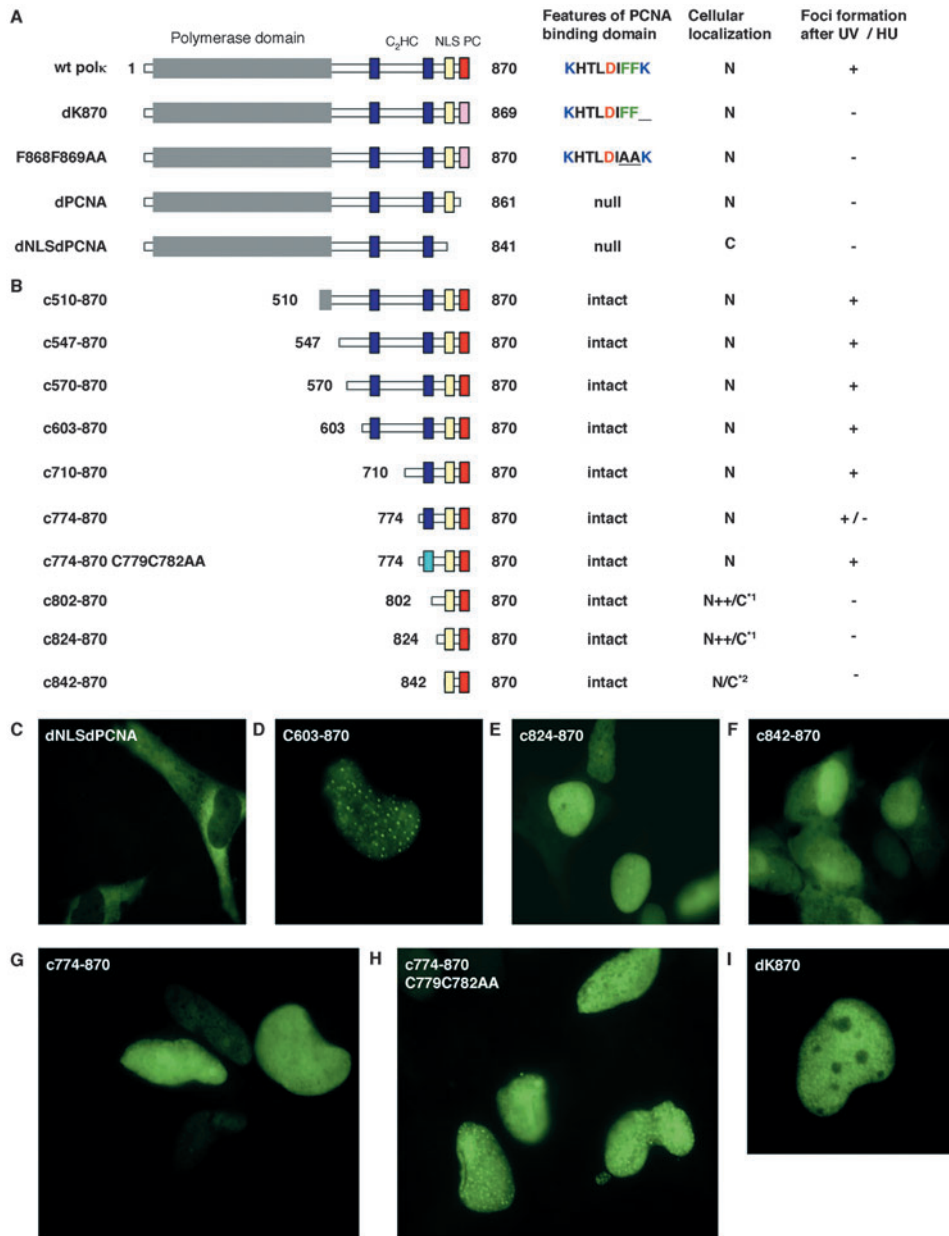

**Fig. 3.** The C-terminal region of polk protein is required for foci formation. MRC5 cells were transfected with plasmids expressing various eGFP-tagged polk deletion proteins and incubated for 20 hours. Cells were then UV irradiated with 10 J/m<sup>2</sup> or 10 mM HU and further incubated for 6 hours. (A) Summary of foci formation and cellular localisation properties of C-terminal truncation mutants. (B) Summary of foci formation and cellular localisation properties of N-terminal truncation mutants. C, cytoplasmic; C<sub>2</sub>HC, C<sub>2</sub>HC type Zinc finger domain; N, nuclear; NLS, nuclear localisation signal like domain; PC, similar to PCNA binding domain consensus; \*1, both nuclear and cytoplasmic localisation, but majority was nuclear; \*2, both nuclear and cytoplasmic localisation. (C-I) Typical images of UV-irradiated cells expressing eGFP-tagged polk deletion proteins.

can assume that it is also present in replication factories (Tissier et al., 2004). This was not the case with polk: only a small proportion of cells with PCNA foci also contained colocalising polk. Our findings appeared to be different from previously published data (Bergoglio et al., 2002). The results of these authors suggested a localisation pattern for polk similar to that reported in our previous work for pol $\eta$  and polt. By exchanging materials, we eliminated the possibility that this discrepancy was caused by the use of different plasmids and cell lines. A visit by T.O. to the laboratory of Bergoglio and co-workers clarified the discrepancy. In the experiments carried out in our laboratory, all experiments were done as a comparison between localisation of pol $\eta$  and polk, and the differences were immediately apparent. A nucleus was only scored as positive for foci formation if there were many bright foci, as seen in our previous work with pol $\eta$  and polt and exemplified for polk in Fig. 2C-E. Bergoglio and colleagues

did not carry out a comparison with pol $\eta$  and included as positives nuclei with only a very small number of 'foci'. The origin of these foci is not clear, but they would not have been included as positives in our analyses. Irrespective of the precise definition of cells containing foci, our laboratories agree that the pattern of foci formation for polk is completely different from that for pol $\eta$ .

We have considered the possibility that the eGFP protein linked to the N-terminus of polk might impede its correct localisation. Although this cannot be ruled out absolutely, we consider this to be unlikely as: (1) we obtained the same results using two different constructs, in which the linker joining GFP to polk was respectively 4 and 12 amino acids in length; (2) the nature of our constructs was identical to those we used previously for pol $\eta$  and polt; and (3) in preliminary experiments we have shown that an adenovirus vector containing our eGFPpolk construct is able to restore substantial

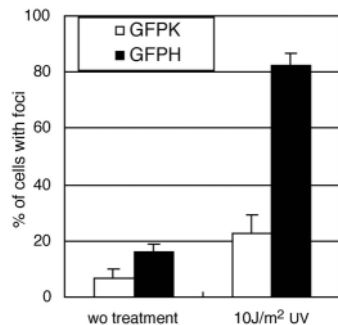

**Fig. 4.** polk foci formation is independent of pol $\eta$ . Pol $\eta$ -deficient XP30RO cells were transfected with pEGFPpolk (GFPK, open bars), pEGFPpol $\eta$  (GFPH, filled bars). 20 hours later, cells were UV irradiated with 10 J/m<sup>2</sup> and then incubated for a further 6 hours. The proportion of cells expressing eGFPpolk or eGFPpol $\eta$  in which the protein was localised in nuclear foci was determined. All the experiments were carried out in triplicate and each data point is the mean of three independent scorings. Error bars indicate standard error.

UV resistance to mouse *Polk*<sup>-/-</sup> cells, confirming that it is biologically active.

The precise function of polk is not clear. However, the substantial sensitivity of *Polk*<sup>-/-</sup> embryonic stem cells to BaP (Ogi et al., 2002), the inducibility of polk by treatment of mice with the polycyclic hydrocarbon, 3-methylcholanthrene (Ogi et al., 2001) and the ability of polk to bypass BaP adducts in vitro (in general inserting C opposite adducted G) (Rechkoblit et al., 2002; Suzuki et al., 2002; Zhang et al., 2002), are all consistent with polk playing a role in TLS past BaP adducts. Our previous work showed that pol $\eta$ , polt and Rev1 are constitutively localised in replication factories in S-phase cells. Thus, we expect that any DNA damaging treatment that blocks the replication fork and causes an accumulation of cells in S phase will result in an increase in the number of cells with foci containing PCNA, pol $\eta$ , polt and Rev1. Therefore, even though the ability of pol $\eta$  to bypass BaP adducts is weak and in general mutagenic (e.g. Chiapperino et al., 2002), the replication factories that accumulate when replication forks are blocked by BaP adducts, all contain pol $\eta$ , as with UV and HU treatment, whereas only a small proportion appear to contain polk, at least as visualised by fluorescent microscopy.

Given the likely function of polk in TLS, why might the localisation pattern of polk and pol $\eta$  be different, despite the rather similar structural features of the proteins? In order to be visible by fluorescence microscopy, a 'focus' must contain 50-100 fluorescently tagged molecules. Recent studies using real-time imaging on living cells have shown that many nuclear proteins involved in responses to DNA damage are highly dynamic within the nucleus (Houtsmuller et al., 1999). Assuming this is also true for TLS polymerases, the number of molecules in a focus will be dependent on the concentration of the tagged molecules, the rates at which molecules enter and leave the focus and the residence time in the focus. Alterations in any of these parameters could affect the observed proportion of cells with foci. Thus, it may indeed be that polk resides in replication foci, but the time of residence is short, so that there are rarely enough polk molecules in a replication factory to be visible as foci. Our results raise the intriguing question as to

how the appropriate polymerase is selected for TLS past different adducts. In the case of UV-induced cyclobutane pyrimidine dimers, pol $\eta$  is present in factories, and can carry out TLS efficiently and accurately. With HU, the issue does not arise, as the fork blockage is caused by depletion of deoxyribonucleotides and this cannot be alleviated by any of the polymerases. With BaP adducts, we may speculate that the apparently high concentrations of pol $\eta$  in the vicinity of the blocked forks enable pol $\eta$  to be the first polymerase to attempt TLS, but as it is inefficient with this adduct, it is often out-competed by polk, which may be present at lower levels but is able to effect TLS more efficiently. These ideas are entirely speculative and await further experimentation to clarify the way in which TLS polymerases are regulated.

Although the localisation of polk in replication foci is much less than that of pol $\eta$ , the elements required for localisation in the nucleus and in nuclear foci are quite similar. The C-terminal domains of both proteins contain the zinc finger motif, bipartite NLS and PCNA binding motif in the same order (although the types of zinc finger differ between the two polymerases, C<sub>2</sub>H<sub>2</sub> in pol $\eta$  and C<sub>2</sub>HC in polk). In both polymerases, the bipartite NLS is required for localisation in the nucleus, and the C-terminal PCNA binding sites, which are conserved in higher eukaryotes, are required for foci formation in both polk (this paper) and pol $\eta$  (P.K., J. Wing and A.R.L., unpublished). Whereas we have shown that the zinc finger motif is required for localisation of pol $\eta$  in foci (our unpublished observations), the domain encompassing one of the zinc fingers is required for polk foci formation, but missense mutations in the zinc finger surprisingly increased foci formation. Although the reason for this is not clear, our results would be consistent with the idea that the zinc finger was involved in turnover of the protein near the replication forks. Our current work is directed towards testing this hypothesis.

This work was supported by MRC Programme Grant 62620 and EC Grant QLG1-CT-1999-00181 to A.R.L. and a Uehara Memorial Foundation grant to T.O. We are grateful to H. Ohmori for polk materials and helpful comments.

## References

- Bergoglio, V., Bavoux, C., Verbiest, V., Hoffmann, J. S. and Cazaux, C. (2002). Localisation of human DNA polymerase  $\kappa$  to replication foci. *J. Cell Sci.* **115**, 4413-4418.
- Broughton, B. C., Cordonnier, A., Kleijer, W. J., Jaspers, N. G., Fawcett, H., Raams, A., Garritsen, V. H., Stary, A., Avril, M. F., Boudsocq, F. et al. (2002). Molecular analysis of mutations in DNA polymerase  $\eta$  in xeroderma pigmentosum-variant patients. *Proc. Natl. Acad. Sci. USA* **99**, 815-820.
- Chiapperino, D., Kroth, H., Kramarczuk, I. H., Sayer, J. M., Masutani, C., Hanaoka, F., Jerina, D. M. and Cheh, A. M. (2002). Preferential misincorporation of purine nucleotides by human DNA polymerase  $\eta$  opposite benzo[a]pyrene 7,8-diol 9,10-epoxide deoxyguanosine adducts. *J. Biol. Chem.* **277**, 11765-11771.
- Fischhaber, P. L., Gerlach, V. L., Feaver, W. J., Hatahet, Z., Wallace, S. S. and Friedberg, E. C. (2002). Human DNA polymerase  $\kappa$  bypasses and extends beyond thymine glycols during translesion synthesis in vitro, preferentially incorporating correct nucleotides. *J. Biol. Chem.* **277**, 37604-37611.
- Gerlach, V. L., Aravind, L., Gotway, G., Schultz, R. A., Koonin, E. V. and Friedberg, E. C. (1999). Human and mouse homologs of *Escherichia coli* DinB (DNA polymerase IV), members of the UmuC/DinB superfamily. *Proc. Natl. Acad. Sci. USA* **96**, 11922-11927.
- Guo, D., Wu, X., Rajpal, D. K., Taylor, J. S. and Wang, Z. (2001).

- Translesion synthesis by yeast DNA polymerase  $\zeta$  from templates containing lesions of ultraviolet radiation and acetylaminofluorene. *Nucleic Acids Res.* **29**, 2875-2883.
- Haracska, L., Unk, I., Johnson, R. E., Phillips, B. B., Hurwitz, J., Prakash, L. and Prakash, S.** (2002). Stimulation of DNA synthesis activity of human DNA polymerase  $\kappa$  by PCNA. *Mol. Cell. Biol.* **22**, 784-791.
- Houtsmuller, A. B., Rademakers, S., Nigg, A. L., Hoogstraten, D., Hoeijmakers, J. H. and Vermeulen, W.** (1999). Action of DNA repair endonuclease ERCC1/XPF in living cells. *Science* **284**, 958-961.
- Johnson, R. E., Kondratieck, C. M., Prakash, S. and Prakash, L.** (1999). *hRAD30* mutations in the variant form of xeroderma pigmentosum. *Science* **285**, 263-265.
- Johnson, R. E., Washington, M. T., Haracska, L., Prakash, S. and Prakash, L.** (2000a). Eukaryotic polymerases  $\iota$  and  $\zeta$  act sequentially to bypass DNA lesions. *Nature* **406**, 1015-1019.
- Johnson, R. E., Washington, M. T., Prakash, S. and Prakash, L.** (2000b). Fidelity of human DNA polymerase  $\eta$ . *J. Biol. Chem.* **275**, 7447-7450.
- Kannouche, P., Broughton, B. C., Volker, M., Hanaoka, F., Mullenders, L. H. F. and Lehmann, A. R.** (2001). Domain structure, localisation and function of DNA polymerase  $\eta$ , defective in xeroderma pigmentosum variant cells. *Genes Dev.* **15**, 158-172.
- Kannouche, P., Fernandez de Henestrosa, A. R., Coull, B., Vidal, A. E., Gray, C., Zicha, D., Woodgate, R. and Lehmann, A. R.** (2003). Localisation of DNA polymerases  $\eta$  and  $\iota$  to the replication machinery is tightly co-ordinated in human cells. *EMBO J.* **22**, 1223-1233.
- Lehmann, A. R.** (2002). Replication of damaged DNA in mammalian cells: new solutions to an old problem. *Mutat. Res.* **509**, 23-34.
- Masutani, C., Kusumoto, R., Yamada, A., Dohmae, N., Yokoi, M., Yuasa, M., Araki, M., Iwai, S., Takio, K. and Hanaoka, F.** (1999). The human *XPV* (xeroderma pigmentosum variant) gene encodes human polymerase  $\eta$ . *Nature* **399**, 700-704.
- Masutani, C., Kusumoto, R., Iwai, S. and Hanaoka, F.** (2000). Accurate translesion synthesis by human DNA polymerase  $\eta$ . *EMBO J.* **19**, 3100-3109.
- Nelson, J. R., Lawrence, C. W. and Hinkle, D. C.** (1996). Deoxycytidyl transferase activity of yeast *REV1* protein. *Nature* **382**, 729-731.
- Nelson, J. R., Gibbs, P. E., Nowicka, A. M., Hinkle, D. C. and Lawrence, C. W.** (2000). Evidence for a second function for *Saccharomyces cerevisiae* Rev1p. *Mol. Microbiol.* **37**, 549-554.
- Ogi, T., Mimura, J., Hikida, M., Fujimoto, H., Fujii-Kuriyama, Y. and Ohmori, H.** (2001). Expression of human and mouse genes encoding polk: testis-specific developmental regulation and AhR-dependent inducible transcription. *Genes Cells* **6**, 943-953.
- Ogi, T., Shinkai, Y., Tanaka, K. and Ohmori, H.** (2002). Pol  $\kappa$  protects mammalian cells against the lethal and mutagenic effects of benzo[a]pyrene. *Proc. Natl. Acad. Sci. USA* **99**, 15548-15553.
- Ohashi, E., Bebenek, K., Matsuda, T., Feaver, W. J., Gerlach, V. L., Friedberg, E. C., Ohmori, H. and Kunkel, T. A.** (2000a). Fidelity and processivity of DNA synthesis by DNA polymerase  $\kappa$ , the product of the human *DINB1* gene. *J. Biol. Chem.* **275**, 39678-39684.
- Ohashi, E., Ogi, T., Kusumoto, R., Iwai, S., Masutani, C., Hanaoka, F. and Ohmori, H.** (2000b). Error-prone bypass of certain DNA lesions by the human DNA polymerase  $\kappa$ . *Genes Dev.* **14**, 1589-1594.
- Ohmori, H., Friedberg, E. C., Fuchs, R. P. P., Goodman, M. F., Hanaoka, F., Hinkle, D., Kunkel, T. A., Lawrence, C. W., Livneh, Z., Nohmi, T. et al.** (2001). The Y-family of DNA polymerases. *Mol. Cell* **8**, 7-8.
- Prakash, S. and Prakash, L.** (2002). Translesion DNA synthesis in eukaryotes: a one- or two-polymerase affair. *Genes Dev.* **16**, 1872-1883.
- Rechkoblit, O., Zhang, Y., Guo, D., Wang, Z., Amin, S., Krzeminsky, J., Louneva, N. and Geacintov, N. E.** (2002). trans-Lesion synthesis past bulky benzo[a]pyrene diol epoxide N2-dG and N6-dA lesions catalyzed by DNA bypass polymerases. *J. Biol. Chem.* **277**, 30488-30494.
- Schenten, D., Gerlach, V. L., Guo, C., Velasco-Miguel, S., Hladik, C. L., White, C. L., Friedberg, E. C., Rajewsky, K. and Esposito, G.** (2002). DNA polymerase  $\kappa$  deficiency does not affect somatic hypermutation in mice. *Eur. J. Immunol.* **32**, 3152-3160.
- Suzuki, N., Ohashi, E., Kolbanovskiy, A., Geacintov, N. E., Grollman, A. P., Ohmori, H. and Shibutani, S.** (2002). Translesion synthesis by human DNA polymerase  $\kappa$  on a DNA template containing a single stereoisomer of dG-(+)- or dG-(-)-anti-N(2)-BPDE (7,8-dihydroxy-anti-9,10-epoxy-7,8,9,10-tetrahydrobenzo[a]pyrene). *Biochemistry* **41**, 6100-6106.
- Tissier, A., McDonald, J. P., Frank, E. G. and Woodgate, R.** (2000). Polt, a remarkably error-prone human DNA polymerase. *Genes Dev.* **14**, 1642-1650.
- Tissier, A., Kannouche, P., Reck, M.-P., Lehmann, A. R., Fuchs, R. P. P. and Cordonnier, A.** (2004). Colocalisation in replication foci and interaction of human Y-family members, DNA polymerase pol $\eta$  and Rev1 protein. *DNA Rep.* **3**, 1503-1514.
- Zhang, Y., Wu, X., Guo, D., Rechkoblit, O. and Wang, Z.** (2002). Activities of human DNA polymerase  $\kappa$  in response to the major benzo[a]pyrene DNA adduct: error-free lesion bypass and extension synthesis from opposite the lesion. *DNA Rep.* **1**, 559-569.
